# Supplementary material for: Cardioprotective Effects of Taurisolo® in Cardiomyoblast H9c2 Cells under High-Glucose and Trimethylamine N-Oxide Treatment via De Novo Sphingolipid Synthesis
Source: Hindawi journal article supplement (doi:10.1155/2020/2961406), 2020-11-12
Supplement: f1 [file 2961406.f1.pdf]

## Supplementary Material

In the Table1 we reported the  $m/z$  and the identity of the most representative ion positive peaks of lipid extracted of the medium of H9c2.

**Table 1:** Assignments of the  $m/z$  ratios detected in the positive ion mass spectra of the lipid extracts in the growth medium of HG-H9c2 (44mM glucose) and THG-H9c2 (44 mMglucose+TMAO 50  $\mu$ M) cells before and after treatment with Tau 0.5 $\mu$ g/ $\mu$ L .

| $m/z$         | Identity                                                                                                                            |
|---------------|-------------------------------------------------------------------------------------------------------------------------------------|
| 353.1 $\pm$ 1 | C-16 Sph1P                                                                                                                          |
| 381.3 $\pm$ 1 | C-18 Sph1P                                                                                                                          |
| 449 $\pm$ 1   | d18: 1 sphingoid base and phosphocholine headgroup                                                                                  |
| 709 $\pm$ 1   | Sphingomyelin (SM)                                                                                                                  |
| 685 $\pm$ 1   | Phosphoethanolamine-Cer (PE-Cer)                                                                                                    |
| 783 $\pm$ 1   | 1-Phospho-(1'-myo-inositol)-Cer(d18:0/16:0)                                                                                         |
| 1111 $\pm$ 1  | MIPC(N-(hexacosanoyl)-eicosasphinganine-1-O-[D-mannopyranosyl-alpha1-2-myoinositol-1-phosphate])                                    |
| 1200 $\pm$ 1  | PIM2 (2'-O-(alpha-D-Manp)-6'-O-(alpha-D-Manp)-(1-(9Z,12Z-nonadecadienoyl)-2-(9Z-octadecenoyl)-sn-glycero-3-phospho-1'-myo-inositol) |
| 1368 $\pm$ 1  | Glu/Gal-Ceramide                                                                                                                    |
